# Supplementary material for: Cost-effectiveness of bivalent versus monovalent vaccines against hand, foot and mouth disease
Source: PubMed Central journal article supplement — Clin Microbiol Infect. Author manuscript; Available in PMC 2020 May 4. (PMC6942242; doi:10.1016/j.cmi.2019.06.029), 2019-07-04
Supplement: NIHMS1046317-supplement-Supplemental.pdf [file NIHMS1046317-supplement-Supplemental.pdf]

1 **Supplementary**

2 Cost-effectiveness of bivalent versus monovalent vaccines against hand, foot and mouth disease

3

4

5 **Contents**

6 Uncertainty regarding test-negatives ..... 2

7 Costs and QALY loss..... 3

8 Threshold vaccine cost (TVC) ..... 4

9 Table S1 ..... 5

10 Table S2 ..... 6

11 Table S3 ..... 7

12 Figure S1 ..... 9

13 Figure S2..... 10

14 Figure S3..... 11

15 Figure S4..... 12

16 References..... 13

17

18

19 **Uncertainty regarding test-negatives**

20 As mentioned in the main text, we linked national HFMD surveillance data and virological  
21 surveillance records from all 31 provinces to account for the uncertainty regarding the  
22 percentage of test-negatives that were EV71/CA16-HFMD. We considered 51 scenarios (web-  
23 only supplementary Figure S2) according to assumptions regarding: 1) the percentage of test-  
24 negatives that were mild cases during 2010-2012; 2) the respective percentage of mild test-  
25 negatives that were EV71/CA16-HFMD during 2010-2013; 3) the respective percentage of  
26 fatal/severe test-negatives that were EV71/CA16-HFMD during 2010-2013.

27 On assumption 1), we considered three possibilities: a) the percentage of test-negatives that  
28 were mild cases was the same as that of test-positives, b) all test-negatives were fatal/severe  
29 cases, c) all test-negatives were mild cases. Notably, if the number of fatal/severe cases in any  
30 possibility exceeded the number of fatal/severe cases registered in national surveillance system,  
31 the excess would be classified as mild cases.

32 To consider the uncertainty regarding the respective percentage of mild test-negatives that  
33 were EV71/CA16-HFMD in assumption 2), we considered five possibilities: a) none of mild  
34 test-negatives were EV71/CA16-HFMD, b) the percentage of mild test-negatives that were  
35 EV71/CA16-HFMD was the same as that of mild test-positives, c) all mild test-negatives were  
36 EV71-HFMD, d) all mild test-negatives were EV71/ CA16-HFMD, in which the respective  
37 percentage of EV71/CA16-HFMD was the same as that of mild test-positives (i.e. % of mild  
38 test-negatives that were EV71-HFMD = No. mild test-positives that were EV71-HFMD/ (No.  
39 mild test-positives that were EV71/CA16-HFMD), e) all mild test-negatives were CA16-HFMD.

40 We also considered five possibilities on assumption 3) regarding fatal/severe cases, similar  
41 with those on assumption 2).

## 42 **Costs and QALY loss**

43 A caregiver survey was previously conducted to measure the costs and health-related quality of life  
44 associated with HFMD in 2012-2013 [1]. As with the methodology of our previous paper [2], severity-  
45 specific costs and QALY loss of CA16-HFMD per birth were calculated by multiplying weighted costs  
46 and QALY loss of CA16-HFMD per case by risk of CA16-HFMD per birth. We calculated costs and  
47 QALY loss per case accounting for discounting, the age distribution of severity-specific CA16-HFMD  
48 cases in each province, and the severity-specific risk distribution among all the provinces (i.e. the  
49 probability that a given severity-specific HFMD case was from a certain province). Costs and QALY loss  
50 due to mild, severe, and fatal EV71-HFMD were also estimated by the same method. All costs were  
51 reported in Chinese Yuan during 2012-2013 but were inflated to 2017-2018 prices using China's annual  
52 consumer price index (health care) [3] before being converted to 2017 Euro (€, 1 € = 7.75 Chinese Yuan).

53

54 As adverse events due to monovalent EV71 vaccination reported in the phase III trials were usually mild  
55 and uncommon [4-6], we did not consider such events in our CEA of bivalent EV71/CA16 and  
56 monovalent EV71 vaccination. We also excluded the productivity loss due to premature death as done in  
57 our previous study.

58

59 **Threshold vaccine cost (TVC)**

60 Let  $VC_m$  and  $VC_{bi}$  denote the vaccine cost of monovalent EV71 vaccine and bivalent EV71/CA16 vaccine,  
 61 respectively. Let  $C_1$  and  $C_2$  denote the cost due to EV71/CA16-HFMD per birth,  $Q_1$  and  $Q_2$  denote the  
 62 QALY loss due to EV71/CA16-HFMD per birth,  $VE_1$  and  $VE_2$  denote the bivalent vaccine efficacy  
 63 against EV71/CA16-HFMD, respectively. Let  $VE_m$  denote the monovalent vaccine efficacy against  
 64 EV71-HFMD, and  $\Delta VE_1 = VE_1 - VE_m$  denote the differential vaccine efficacy against EV71-HFMD  
 65 between the two vaccines. The incremental cost-effectiveness ratio (ICER) of bivalent EV71/CA16  
 66 vaccination versus monovalent EV71 vaccination was calculated as:

$$\begin{aligned} \text{ICER} &= \frac{\text{Cost with bivalent vaccination} - \text{Cost with monovalent EV71 vaccination}}{\text{Health utility with bivalent vaccination} - \text{Health utility with monovalent EV71 vaccination}} \\ 67 \quad &= \frac{(VC_{bi} - VE_1 \times C_1 - VE_2 \times C_2) - (VC_m - VE_m \times C_1)}{(VE_1 \times Q_1 + VE_2 \times Q_2) - (VE_m \times Q_1)} \\ &= \frac{(VC_{bi} - VC_m) - [(VE_1 - VE_m) \times C_1 + VE_2 \times C_2]}{(VE_1 - VE_m) \times Q_1 + VE_2 \times Q_2} \end{aligned}$$

68  
 69 Hence, with a willingness-to-pay (WTP) threshold, TVC of bivalent EV71/CA16 vaccine was as below:

70  $TVC = \Delta VE_1 \times (\text{WTP threshold} \times Q_1 + C_1) + VE_2 \times (\text{WTP threshold} \times Q_2 + C_2).$

71

**Table S1. The probability of each outcome corresponding to bivalent EV71/CA16 vaccination**

| EV71-HFMD        | CA16-HFMD        | Probability                                   |                         |
|------------------|------------------|-----------------------------------------------|-------------------------|
|                  |                  | Bivalent EV71/CA16 vaccination                | No vaccination          |
| No EV71-HFMD     | No CA16-HFMD     | $[1 - (1 - VE_1) P_1] * [1 - (1 - VE_2) P_2]$ | $(1 - P_1) * (1 - P_2)$ |
|                  | Mild CA16-HFMD   | $[1 - (1 - VE_1) P_1] * [(1 - VE_2) P_{m2}]$  | $(1 - P_1) * P_{m2}$    |
|                  | Severe CA16-HFMD | $[1 - (1 - VE_1) P_1] * [(1 - VE_2) P_{s2}]$  | $(1 - P_1) * P_{s2}$    |
|                  | Fatal CA16-HFMD  | $[1 - (1 - VE_1) P_1] * [(1 - VE_2) P_{f2}]$  | $(1 - P_1) * P_{f2}$    |
| Mild EV71-HFMD   | No CA16-HFMD     | $[(1 - VE_1) P_{m1}] * [1 - (1 - VE_2) P_2]$  | $P_{m1} * (1 - P_2)$    |
|                  | Mild CA16-HFMD   | $[(1 - VE_1) P_{m1}] * [(1 - VE_2) P_{m2}]$   | $P_{m1} * P_{m2}$       |
|                  | Severe CA16-HFMD | $[(1 - VE_1) P_{m1}] * [(1 - VE_2) P_{s2}]$   | $P_{m1} * P_{s2}$       |
|                  | Fatal CA16-HFMD  | $[(1 - VE_1) P_{m1}] * [(1 - VE_2) P_{f2}]$   | $P_{m1} * P_{f2}$       |
| Severe EV71-HFMD | No CA16-HFMD     | $[(1 - VE_1) P_{s1}] * [1 - (1 - VE_2) P_2]$  | $P_{s1} * (1 - P_2)$    |
|                  | Mild CA16-HFMD   | $[(1 - VE_1) P_{s1}] * [(1 - VE_2) P_{m2}]$   | $P_{s1} * P_{m2}$       |
|                  | Severe CA16-HFMD | $[(1 - VE_1) P_{s1}] * [(1 - VE_2) P_{s2}]$   | $P_{s1} * P_{s2}$       |
|                  | Fatal CA16-HFMD  | $[(1 - VE_1) P_{s1}] * [(1 - VE_2) P_{f2}]$   | $P_{s1} * P_{f2}$       |
| Fatal EV71-HFMD  | No CA16-HFMD     | $[(1 - VE_1) P_{f1}] * [1 - (1 - VE_2) P_2]$  | $P_{f1} * (1 - P_2)$    |
|                  | Mild CA16-HFMD   | $[(1 - VE_1) P_{f1}] * [(1 - VE_2) P_{m2}]$   | $P_{f1} * P_{m2}$       |
|                  | Severe CA16-HFMD | $[(1 - VE_1) P_{f1}] * [(1 - VE_2) P_{s2}]$   | $P_{f1} * P_{s2}$       |
|                  | Fatal CA16-HFMD  | $[(1 - VE_1) P_{f1}] * [(1 - VE_2) P_{f2}]$   | $P_{f1} * P_{f2}$       |

$P_{m1}, P_{s1}$  and  $P_{f1}$  denote the national average risk of mild, severe and fatal EV71-HFMD per child, respectively.

$P_{m2}, P_{s2}$  and  $P_{f2}$  denote the national average risk of mild, severe and fatal CA16-HFMD per child, respectively.

$P_1$  and  $P_2$  denote the national average risk of EV71-HFMD and CA16-HFMD per child, respectively.

72

73

**Table S2. The probability of each outcome corresponding to monovalent EV71 vaccination**

| EV71-HFMD        | CA16-HFMD        | Probability                        |                         |
|------------------|------------------|------------------------------------|-------------------------|
|                  |                  | Monovalent EV71 vaccination        | No vaccination          |
| No EV71-HFMD     | No CA16-HFMD     | $[1 - (1 - VE_m) P_1] * (1 - P_2)$ | $(1 - P_1) * (1 - P_2)$ |
|                  | Mild CA16-HFMD   | $[1 - (1 - VE_m) P_1] * P_{m2}$    | $(1 - P_1) * P_{m2}$    |
|                  | Severe CA16-HFMD | $[1 - (1 - VE_m) P_1] * P_{s2}$    | $(1 - P_1) * P_{s2}$    |
|                  | Fatal CA16-HFMD  | $[1 - (1 - VE_m) P_1] * P_{f2}$    | $(1 - P_1) * P_{f2}$    |
| Mild EV71-HFMD   | No CA16-HFMD     | $[(1 - VE_m) P_{m1}] * (1 - P_2)$  | $P_{m1} * (1 - P_2)$    |
|                  | Mild CA16-HFMD   | $[(1 - VE_m) P_{m1}] * P_{m2}$     | $P_{m1} * P_{m2}$       |
|                  | Severe CA16-HFMD | $[(1 - VE_m) P_{m1}] * P_{s2}$     | $P_{m1} * P_{s2}$       |
|                  | Fatal CA16-HFMD  | $[(1 - VE_m) P_{m1}] * P_{f2}$     | $P_{m1} * P_{f2}$       |
| Severe EV71-HFMD | No CA16-HFMD     | $[(1 - VE_m) P_{s1}] * (1 - P_2)$  | $P_{s1} * (1 - P_2)$    |
|                  | Mild CA16-HFMD   | $[(1 - VE_m) P_{s1}] * P_{m2}$     | $P_{s1} * P_{m2}$       |
|                  | Severe CA16-HFMD | $[(1 - VE_m) P_{s1}] * P_{s2}$     | $P_{s1} * P_{s2}$       |
|                  | Fatal CA16-HFMD  | $[(1 - VE_m) P_{s1}] * P_{f2}$     | $P_{s1} * P_{f2}$       |
| Fatal EV71-HFMD  | No CA16-HFMD     | $[(1 - VE_m) P_{f1}] * (1 - P_2)$  | $P_{f1} * (1 - P_2)$    |
|                  | Mild CA16-HFMD   | $[(1 - VE_m) P_{f1}] * P_{m2}$     | $P_{f1} * P_{m2}$       |
|                  | Severe CA16-HFMD | $[(1 - VE_m) P_{f1}] * P_{s2}$     | $P_{f1} * P_{s2}$       |
|                  | Fatal CA16-HFMD  | $[(1 - VE_m) P_{f1}] * P_{f2}$     | $P_{f1} * P_{f2}$       |

$P_{m1}$ ,  $P_{s1}$  and  $P_{f1}$  denote the national average risk of mild, severe and fatal EV71-HFMD per child, respectively.

$P_{m2}$ ,  $P_{s2}$  and  $P_{f2}$  denote the national average risk of mild, severe and fatal CA16-HFMD per child, respectively.

$P_1$  and  $P_2$  denote the national average risk of EV71-HFMD and CA16-HFMD per child, respectively.

74

75

76

Table S3. **Threshold vaccine cost (€) with different cost estimates and annual discount rates**

| Scenario | 3% annual discount rate     |                             | 6% annual discount rate     |                             |
|----------|-----------------------------|-----------------------------|-----------------------------|-----------------------------|
|          | Including productivity loss | Excluding productivity loss | Including productivity loss | Excluding productivity loss |
| 1        | 4.7(4.2-5.2)                | 3.8(3.4-4.2)                | 4.4(3.9-4.9)                | 3.6(3.2-3.9)                |
| 2        | 6.9(6.1-7.7)                | 5.6(5.0-6.1)                | 6.5(5.8-7.2)                | 5.2(4.7-5.8)                |
| 3        | 4.7(4.2-5.2)                | 3.8(3.4-4.2)                | 4.4(3.9-4.9)                | 3.6(3.2-3.9)                |
| 4        | 7.9(7.0-8.8)                | 6.4(5.7-7.0)                | 7.5(6.6-8.4)                | 6.0(5.4-6.6)                |
| 5        | 12.3(10.9-13.7)             | 9.8(8.8-10.8)               | 11.6(10.3-13.0)             | 9.3(8.3-10.2)               |
| 6        | 4.8(4.3-5.3)                | 3.9(3.5-4.3)                | 4.5(4.0-5.0)                | 3.6(3.3-4.0)                |
| 7        | 7.0(6.2-7.8)                | 5.6(5.1-6.2)                | 6.6(5.9-7.3)                | 5.3(4.8-5.8)                |
| 8        | 4.8(4.3-5.3)                | 3.9(3.5-4.3)                | 4.5(4.0-5.0)                | 3.6(3.3-4.0)                |
| 9        | 8.0(7.1-9.0)                | 6.5(5.8-7.1)                | 7.6(6.7-8.4)                | 6.1(5.5-6.7)                |
| 10       | 12.4(11.0-13.8)             | 9.9(8.9-10.9)               | 11.7(10.3-13.1)             | 9.3(8.4-10.3)               |
| 11       | 4.7(4.2-5.2)                | 3.8(3.4-4.2)                | 4.4(3.9-4.9)                | 3.5(3.2-3.9)                |
| 12       | 6.9(6.1-7.7)                | 5.6(5.0-6.1)                | 6.5(5.8-7.3)                | 5.2(4.7-5.7)                |
| 13       | 4.7(4.2-5.2)                | 3.8(3.4-4.2)                | 4.4(3.9-4.9)                | 3.5(3.2-3.9)                |
| 14       | 8.0(7.1-8.9)                | 6.4(5.7-7.0)                | 7.5(6.6-8.3)                | 6.0(5.4-6.6)                |
| 15       | 12.3(10.9-13.7)             | 9.8(8.8-10.8)               | 11.6(10.3-13.0)             | 9.3(8.3-10.2)               |
| 16       | 4.8(4.3-5.4)                | 3.9(3.6-4.3)                | 4.5(4.0-5.0)                | 3.6(3.3-4.0)                |
| 17       | 7.1(6.3-7.8)                | 5.7(5.1-6.2)                | 6.6(5.9-7.4)                | 5.3(4.8-5.8)                |
| 18       | 4.8(4.3-5.4)                | 3.9(3.5-4.3)                | 4.5(4.0-5.0)                | 3.6(3.3-4.0)                |
| 19       | 8.1(7.2-9.0)                | 6.5(5.8-7.1)                | 7.6(6.7-8.4)                | 6.1(5.5-6.7)                |
| 20       | 12.4(11.0-13.8)             | 10.0(9.0-10.9)              | 11.7(10.4-13.1)             | 9.4(8.4-10.3)               |
| 21       | 6.1(5.5-6.6)                | 5.1(4.7-5.5)                | 5.4(4.9-5.9)                | 4.5(4.1-4.9)                |
| 22       | 8.3(7.5-9.1)                | 6.9(6.3-7.5)                | 7.5(6.8-8.3)                | 6.2(5.6-6.7)                |
| 23       | 6.1(5.5-6.6)                | 5.1(4.7-5.5)                | 5.4(4.9-5.9)                | 4.5(4.1-4.9)                |
| 24       | 9.3(8.4-10.2)               | 7.7(7.0-8.4)                | 8.5(7.6-9.4)                | 7.0(6.3-7.6)                |
| 25       | 13.6(12.2-15.1)             | 11.2(10.1-12.2)             | 12.6(11.3-13.9)             | 10.3(9.3-11.2)              |
| 26       | 4.9(4.4-5.4)                | 3.9(3.6-4.3)                | 4.6(4.1-5.1)                | 3.7(3.3-4.1)                |
| 27       | 6.9(6.1-7.7)                | 5.5(5.0-6.1)                | 6.5(5.8-7.2)                | 5.2(4.7-5.7)                |
| 28       | 4.9(4.4-5.4)                | 3.9(3.6-4.3)                | 4.6(4.1-5.1)                | 3.7(3.3-4.1)                |
| 29       | 7.8(6.9-8.7)                | 6.3(5.6-6.9)                | 7.4(6.6-8.2)                | 5.9(5.3-6.5)                |
| 30       | 11.6(10.2-13.0)             | 9.3(8.3-10.2)               | 11.0(9.7-12.3)              | 8.8(7.9-9.7)                |

|    |                 |                 |                 |                |
|----|-----------------|-----------------|-----------------|----------------|
| 31 | 5.0(4.5-5.6)    | 4.1(3.7-4.4)    | 4.7(4.2-5.2)    | 3.8(3.4-4.1)   |
| 32 | 5.0(4.5-5.6)    | 4.1(3.7-4.5)    | 4.7(4.2-5.2)    | 3.8(3.4-4.2)   |
| 33 | 8.0(7.1-8.9)    | 6.4(5.7-7.0)    | 7.5(6.7-8.3)    | 6.0(5.4-6.6)   |
| 34 | 11.8(10.4-13.1) | 9.4(8.4-10.3)   | 11.1(9.8-12.5)  | 8.9(8.0-9.8)   |
| 35 | 4.9(4.3-5.4)    | 3.9(3.6-4.3)    | 4.6(4.1-5.1)    | 3.7(3.3-4.1)   |
| 36 | 6.9(6.1-7.7)    | 5.5(5.0-6.1)    | 6.5(5.8-7.2)    | 5.2(4.7-5.7)   |
| 37 | 4.9(4.4-5.4)    | 3.9(3.6-4.3)    | 4.6(4.1-5.1)    | 3.7(3.3-4.1)   |
| 38 | 7.8(6.9-8.7)    | 6.3(5.6-6.9)    | 7.4(6.6-8.2)    | 5.9(5.3-6.5)   |
| 39 | 11.6(10.2-13.0) | 9.3(8.3-10.2)   | 11.0(9.7-12.3)  | 8.8(7.9-9.7)   |
| 40 | 5.1(4.5-5.6)    | 4.1(3.7-4.5)    | 4.7(4.2-5.2)    | 3.8(3.4-4.2)   |
| 41 | 7.1(6.3-7.9)    | 5.7(5.1-6.3)    | 6.6(5.9-7.4)    | 5.3(4.8-5.8)   |
| 42 | 5.1(4.5-5.6)    | 4.1(3.7-4.5)    | 4.7(4.2-5.2)    | 3.8(3.5-4.2)   |
| 43 | 11.8(10.5-13.2) | 9.4(8.5-10.4)   | 11.1(9.8-12.4)  | 8.9(8.0-9.8)   |
| 44 | 6.8(6.2-7.4)    | 5.8(5.3-6.3)    | 6.0(5.4-6.6)    | 5.1(4.7-5.5)   |
| 45 | 8.8(7.9-9.6)    | 7.4(6.8-8.0)    | 7.9(7.1-8.7)    | 6.6(6.0-7.2)   |
| 46 | 6.8(6.2-7.4)    | 5.8(5.3-6.3)    | 6.0(5.4-6.6)    | 5.1(4.6-5.5)   |
| 47 | 9.7(8.8-10.7)   | 8.1(7.5-8.8)    | 8.8(7.9-9.7)    | 7.3(6.6-7.9)   |
| 48 | 13.6(12.2-15.0) | 11.1(10.1-12.1) | 12.4(11.1-13.8) | 10.1(9.2-11.1) |
| 49 | 4.6(4.1-5.2)    | 3.8(3.4-4.1)    | 4.3(3.9-4.8)    | 3.5(3.2-3.8)   |
| 50 | 4.6(4.1-5.1)    | 3.8(3.4-4.1)    | 4.3(3.9-4.8)    | 3.5(3.2-3.8)   |
| 51 | 12.9(11.4-14.3) | 10.3(9.3-11.3)  | 12.2(10.8-13.6) | 9.7(8.8-10.7)  |

---

The threshold vaccine cost listed here were all calculated with a willingness-to-pay threshold of one GDP per capita and with  $VE_m$ ,  $VE_1$  and  $VE_2$  all being 95%.



78 **Figure S1. Comparison of the cumulative incidence predicted in the dynamic model with and**  
79 **without cross-protection.** The dynamic model presented here is a two-strain SIR model adapted from the  
80 TSIR model used in Takahashi et al [7]. The duration of cross-protection varied between 0 days (i.e.  
81 dynamic model without cross-protection) and 90 days. We estimated the cumulative incidence with an  
82 infectious period of 7 days and 14 days for both EV71-HFMD and CA16-HFMD, respectively. The  
83 cumulative incidence predicted by the model with cross-protection was very similar with those predicted  
84 by the model without cross-protection. With an infectious period of 7 days, the cumulative incidence of  
85 EV71-HFMD predicted by the dynamic model ranged from 96,436.7 to 99,303.9 per 100,000 with the  
86 duration of cross-protection ranging from 90 days to 0 days. And the cumulative incidence of EV71-  
87 HFMD ranged from 96,728.9 to 99,303.7 per 100,000 with the duration of cross-protection ranging from  
88 90 days to 0 days and an infectious period of 14 days. For CA16-HFMD, this ranged from 96,500.0 to  
89 99,326.4 per 100,000 with an infectious period of 7 days, and from 96,787.9 to 99,326.3 per 100,000 with  
90 an infectious period of 14 days.

91 **Figure S2. Estimating the percentage of mild and fatal/severe cases that were EV71/CA16-HFMD.**

92 Fifty-five scenarios were generated by three assumptions regarding: 1) the percentage of test-negatives  
93 that were mild cases (the rhombus branching point); 2) the percentage of mild test-negatives that were  
94 EV71/CA16-HFMD (the branching point in light green shades); 3) the percentage of fatal/severe test-  
95 negatives that were EV71/CA16-HFMD (the branching point in light blue shades). When all test-  
96 negatives were estimated as EV71/CA16-HFMD, there were three possibilities: a) all mild test-negatives  
97 were EV71-HFMD (the third column); b) all mild test-negatives were EV71/CA16-HFMD, and the  
98 percentage of mild test-negatives that were EV71/CA16-HFMD was the same as that of mild test-  
99 positives (i.e.  $\% \text{ of mild test-negatives that were EV71-HFMD} = \frac{\text{No. mild test-positives that were EV71-}}{\text{No. mild test-positives that were EV71/CA16-HFMD}}$ ;  
100 HFMD/ No. mild test-positives that were EV71/CA16-HFMD; the fourth column); 3) all mild test-  
101 negatives were CA16-HFMD (the fifth column). The same is true of the percentage that all fatal/severe  
102 test-negatives were EV71/CA16-HFMD. The scenario colored in purple (scenario 1) was the base case in  
103 our analysis. The risk of EV71/CA16-HFMD in the three scenarios colored in blue were identical to each  
104 other, and so were the three scenarios colored in grass green. Thus, there were only 51 unique scenarios  
105 generated in our study.

106

107 **Figure S3. Comparative cost-effectiveness of bivalent EV71/CA16 versus monovalent EV71**  
108 **vaccination with different vaccine efficacies.** A, B, C and D correspond to situations where  $VE_1$  are  
109 70%, 80%, 95% and 100%, respectively. TVC is calculated with a willingness-to-pay threshold of GDP  
110 per capita (€7,698 in 2017) and an annual discount rate of 3%. The 51 test-negative scenarios are listed  
111 along y-axis from bottom to top in the same ascending order of TVC as that in Figure 3.

112

113

114

115

116

117

118

119

120

121

122

123

124

125

126 **Figure S4. Estimated risk, costs, and QALY loss attributable to EV71-HFMD and CA16-HFMD in**  
127 **the base case.** The error bars show the 95% CIs, but they are not apparent in some cases. (A) The  
128 estimated national average risk of EV71-HFMD and CA16-HFMD per 100,000 births. The risk of mild  
129 EV71/CA16-HFMD were 3,088 (95% CI: 3,084-3,093) and 2,162 (2,158-2,166) per 100,000 births; the  
130 risk of severe EV71/CA16-HFMD were 83.4 (82.7-84.2) and 6.6 (6.4-6.8) per 100,000 births; and the risk  
131 of fatal EV71/CA16-HFMD were 3.13 (2.99-3.28) and 0.07 (0.05-0.10) per 100,000 births. (B) Estimated  
132 costs and WTP threshold times QALY loss due to EV71/CA16-HFMD per birth. The estimated costs of  
133 mild EV71-HFMD and CA16-HFMD per birth were €7.37 (6.58-8.17) and €3.97 (3.50-4.44); the  
134 estimated costs of severe EV71-HFMD and CA16-HFMD were €2.52 (2.33-2.71) and €0.17 (0.13-0.22);  
135 and the estimated costs of fatal EV71-HFMD and CA16-HFMD were €0.07 (0.04-0.10) and €0.001  
136 (0.001-0.002). The estimated WTP threshold times QALY loss were €0.86 (0.77-0.96) and €0.64 (0.49-  
137 0.78) for mild EV71-HFMD and CA16-HFMD; €0.09 (0.09-0.10) and €0.006 (0.004-0.008) for severe  
138 EV71-HFMD and CA16-HFMD; €7.33 (7.33-7.33) and €0.17 (0.17-0.17) for fatal EV71-HFMD and  
139 CA16-HFMD.  
140

141 **References**

- 142 1. Zheng Y, Jit M, Wu JT, Yang J, Leung K, Liao Q, et al. Economic costs and health-related  
143 quality of life for hand, foot and mouth disease (HFMD) patients in China. *PLoS One*. 2017,  
144 12(9):e0184266.
- 145 2. Wu JT, Jit M, Zheng Y, Leung K, Xing W, Yang J, et al. Routine Pediatric Enterovirus 71  
146 Vaccination in China: a Cost-Effectiveness Analysis. *PLoS Med*. 2016, 13(3):e1001975.
- 147 3. National Bureau of Statistics of China. Consumer Price Indices by category (The same month last  
148 year = 100) [in Chinese]. <http://data.stats.gov.cn/english/easyquery.htm?cn=A01>. Accessed 27  
149 Sep 2018.
- 150 4. Li R, Liu L, Mo Z, Wang X, Xia J, Liang Z, et al. An inactivated enterovirus 71 vaccine in  
151 healthy children. *N Engl J Med*. 2014, 370(9):829-837.
- 152 5. Zhu F, Xu W, Xia J, Liang Z, Liu Y, Zhang X, et al. Efficacy, safety, and immunogenicity of an  
153 enterovirus 71 vaccine in China. *N Engl J Med*. 2014, 370(9):818-828.
- 154 6. Zhu F-C, Meng F-Y, Li J-X, Li X-L, Mao Q-Y, Tao H, et al. Efficacy, safety, and immunology of  
155 an inactivated alum-adjuvant enterovirus 71 vaccine in children in China: a multicentre,  
156 randomised, double-blind, placebo-controlled, phase 3 trial. *The Lancet*. 2013, 381(9882):2024-  
157 2032.
- 158 7. Takahashi S, Liao Q, Van Boeckel TP, Xing W, Sun J, Hsiao VY, et al. Hand, Foot, and Mouth  
159 Disease in China: Modeling Epidemic Dynamics of Enterovirus Serotypes and Implications for  
160 Vaccination. *PLoS Med*. 2016, 13(2):e1001958.

161
